# Supplementary material for: Polydopamine Antioxidant Hydrogels for Wound Healing Applications
Source: PubMed Central journal article supplement (PMC7709666; doi:10.3390/gels6040039), 2020-10-31
Supplement: gels-06-00039-s001.pdf [file gels-06-00039-s001.pdf]

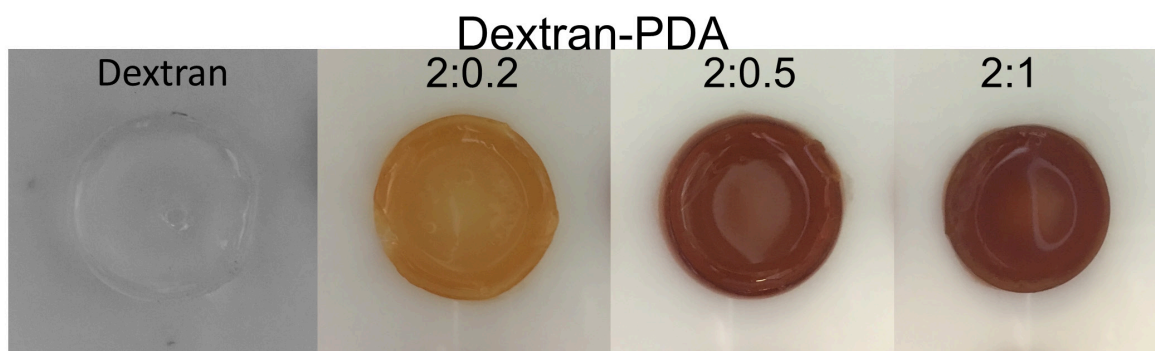

Figure S1. Representative image of hydrogels with feed ratios of dextran:dopamine ranging 2:1 – 2:0.2.

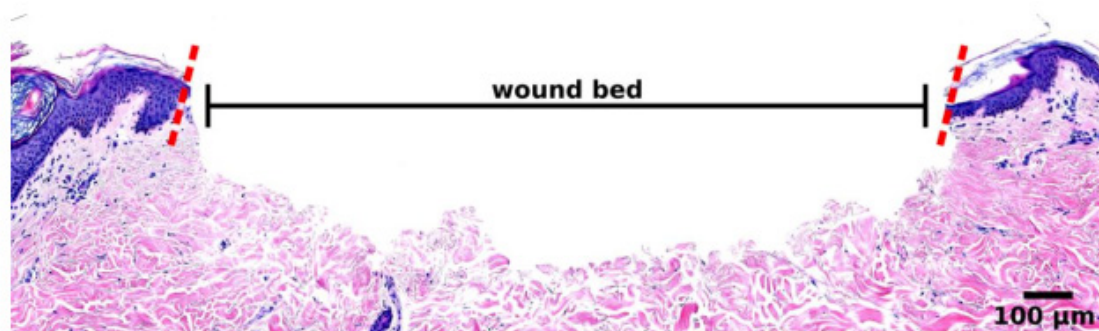

Figure S2. H&E stain of transverse section of human abdominal skin explants showing an untreated wound bed.
